# Supplementary material for: Advanced iron-overload cardiomyopathy in a genetic murine model is rescued by resveratrol therapy
Source: PubMed Central journal article supplement (PMC6435471; doi:10.1042/bsr20171302), 2018-01-10

**Advanced iron-overload cardiomyopathy in a genetic murine model  
is rescued by resveratrol therapy**

**by**

Subhash K. Das<sup>1,2,3</sup>, Pavel Zhabyeyev<sup>1,2,3</sup>, Ratnadeep Basu<sup>1,2,3</sup>, Vaibhav B. Patel<sup>1,2,3</sup>,  
Jason R. B. Dyck<sup>3,5</sup>, Zamaneh Kassiri<sup>2,3,4</sup>, and Gavin Y. Oudit<sup>1,2,3</sup>

<sup>1</sup>Division of Cardiology, Department of Medicine, <sup>2</sup>Mazankowski Alberta Heart Institute,  
<sup>3</sup>Cardiovascular Research Centre, <sup>4</sup>Department of Physiology, University of  
Alberta, <sup>5</sup>Departments of Pediatrics and Pharmacology, University of Alberta, Edmonton,  
Canada

## Supplemental Table 1: List of Taqman Primers and Probes

| Gene                | Type                           | Sequence                                                                                                               |
|---------------------|--------------------------------|------------------------------------------------------------------------------------------------------------------------|
| ANF                 | Forward:<br>Reverse:<br>Probe: | 5'-GGA GGA GAA GAT GCC GGT AGA-3'<br>5'-GCT TCC TCA GTC TGC TCA CTC A-3'<br>5'-FAM-TGA GGT CAT GCC CCC GCA GG-TAMRA-3' |
| BNP                 | Forward:<br>Reverse:<br>Probe: | 5'-CTG CTG GAG CTG ATA AGA GA-3'<br>5'-TGC CCA AAG CAG CTT GAG AT-3'<br>5'-FAM-CTC AAG GCA GCA CCC TCC GGG-TAMRA-3'    |
| $\beta$ - MHC       | Forward:<br>Reverse:<br>Probe: | 5'-GTGCCA AGG GCC TGA ATG AG-3'<br>5'-GCA AAG GCT CCA GGT CTG A-3'<br>5'-FAM-ATC TTG TGC TAC CCA GCT CTA A-TAMRA-3'    |
| Pro-Collagen-I      | Forward:<br>Reverse:<br>Probe: | 5'- CTTCACCTACAGCACCTTGTG-3'<br>5'-TGACTGTCTTGCCCAAGTTC-3'<br>5'-FAM-CTGCACGAGTCACACC-TAMRA-3'                         |
| Pro-Collagen-III    | Forward:<br>Reverse:<br>Probe: | 5'- TGTCCTTTGCGATGACATAATCTG -3'<br>5'- AATGGGATCTCTGGGTTGGG-3'<br>5'-FAM- ATGAGGAGCCACTAGACT-TAMRA-3'                 |
| IL-6                | Forward:<br>Reverse:<br>Probe: | 5'-ACAACCACGGCCTTCCCTACTT-3'<br>5'-CACGATTTCCCAGAGAACATGTG-3'<br>5'-FAM-TTCACAGAGGATACCACTCCCAACAGACCT-TAMRA-3'        |
| IL-1 $\beta$        | Forward:<br>Reverse:<br>Probe: | 5'-AACCTGCTGGTGTGTGACGTTC-3'<br>5'-CAGCACGAGGCTTTTTTGTGT-3'<br>5'- FAM-TTAGACAGCTGCACTACAGGCTCCGAGATG-TAMRA-3'         |
| TNF- $\alpha$       | Forward:<br>Reverse:<br>Probe: | 5'- ACAAGGCTGCCCCGACTAC-3'<br>5'- TTTCTCCTGGTATGAGATAGCAAATC-3'<br>5'-FAM-TGCTCCTACCCACACCGTCAGC-TAMRA-3'              |
| Trfc(Transferrin R) | premix                         | Mm00441941_m1*                                                                                                         |
| HJV(Hemojuvelin)    | Premix                         | Mm00510148_s1                                                                                                          |
| FPN1(Ferroportin)   | Premix                         | Mm00489837_m1*                                                                                                         |
| HAMP1(Hepcidin1)    | Premix                         | Mm00519025_m1                                                                                                          |
| Ftl1(Ferritin-L)    | Premix                         | Mm03030144_g1                                                                                                          |
| Fth1(Ferritin-H)    | Premix                         | Mm00085707_g1                                                                                                          |
| 18S rRNA            | Premix                         | Mm03928990_g1*                                                                                                         |

**Supplemental Table 2. Myocardial gene expression analysis of inflammatory cytokines in hemojuvelin knockout mice at 1 year of age**

|                     | HJVKO+Vehicle           | HJVKO+Iron+Placebo      | HJVKO+Iron+Resveratrol  |
|---------------------|-------------------------|-------------------------|-------------------------|
| n                   | 8                       | 8                       | 8                       |
| TNF $\alpha$ (R.E.) | 3.12 $\pm$ 0.24 (0.218) | 2.67 $\pm$ 0.31 (0.328) | 3.72 $\pm$ 0.37 (0.281) |
| IL-1 $\beta$ (R.E.) | 1.69 $\pm$ 0.26 (0.435) | 1.89 $\pm$ 0.38 (0.569) | 1.58 $\pm$ 0.34 (0.609) |
| IL-6 (R.E.)         | 7.46 $\pm$ 1.03 (0.391) | 8.01 $\pm$ 1.45 (0.512) | 6.22 $\pm$ 1.26 (0.573) |

Data are presented as Mean  $\pm$  SEM (CV). CV = coefficient of variation. TNF = tumour necrosis factor alpha; IL-1 $\beta$  = interleukin 1 beta; IL-6 = interleukin 6; R.E.=relative expression.

**Supplemental Figure Legends**

**Supplemental Figure 1.** Body composition in HJVKO mice with advanced iron-overload cardiomyopathy. **A.** Body weight. **B.** Total fat. **C.** Fat mass to body weight ratio. **D.** Lean mass to body weight ratio. **E.** Total body water. Ctl=HJV control, Fe=iron diet, Fe+R=iron diet + resveratrol; values are the mean $\pm$ SEM of n=5 hearts in each group.

**Supplemental Figure 2.** Neutrophil immunostaining of cardiac sections of HJVKO mice with advanced iron-overload cardiomyopathy. **A.** Representative images of neutrophil (Ly-6B.2 alloantigen) immunostaining. **B.** Neutrophil count derived from neutrophil immunostaining of cardiac sections. Ctl=HJV control, Fe=iron diet, Fe+R=iron diet + resveratrol; values are the mean $\pm$ SEM of n=6 (3 hearts; 2 sections per heart) for the control, n=8 (4 hearts; 2 sections per heart) for the iron+placebo group, n=8 (4 hearts; 2 sections per heart) for the iron+RSV group, and n=8 (4 hearts; 2 sections per heart) for the positive control (3-day MI); ND=not detected; \*p<0.05 compared with the control group; #p<0.05 compared with the iron group.

**Supplemental Figure 3.** Macrophage immunostaining of cardiac sections of HJVKO mice with advanced iron-overload cardiomyopathy. **A.** Representative images of macrophage (F4/80) immunostaining. **B.** Macrophage count derived from macrophage immunostaining of cardiac sections. Ctl=HJV control, Fe=iron diet, Fe+R=iron diet + resveratrol; values are the mean $\pm$ SEM of n=6 (3 hearts; 2 sections per heart) for the control, n=8 (4 hearts; 2 sections per heart) for the iron+placebo group, n=8 (4 hearts; 2 sections per heart) for the iron+RSV group, and n=8 (4 hearts; 2 sections per heart) for the positive control (3-day MI); ND=not detected; \*p<0.05 compared with the control group; #p<0.05 compared with the iron group.

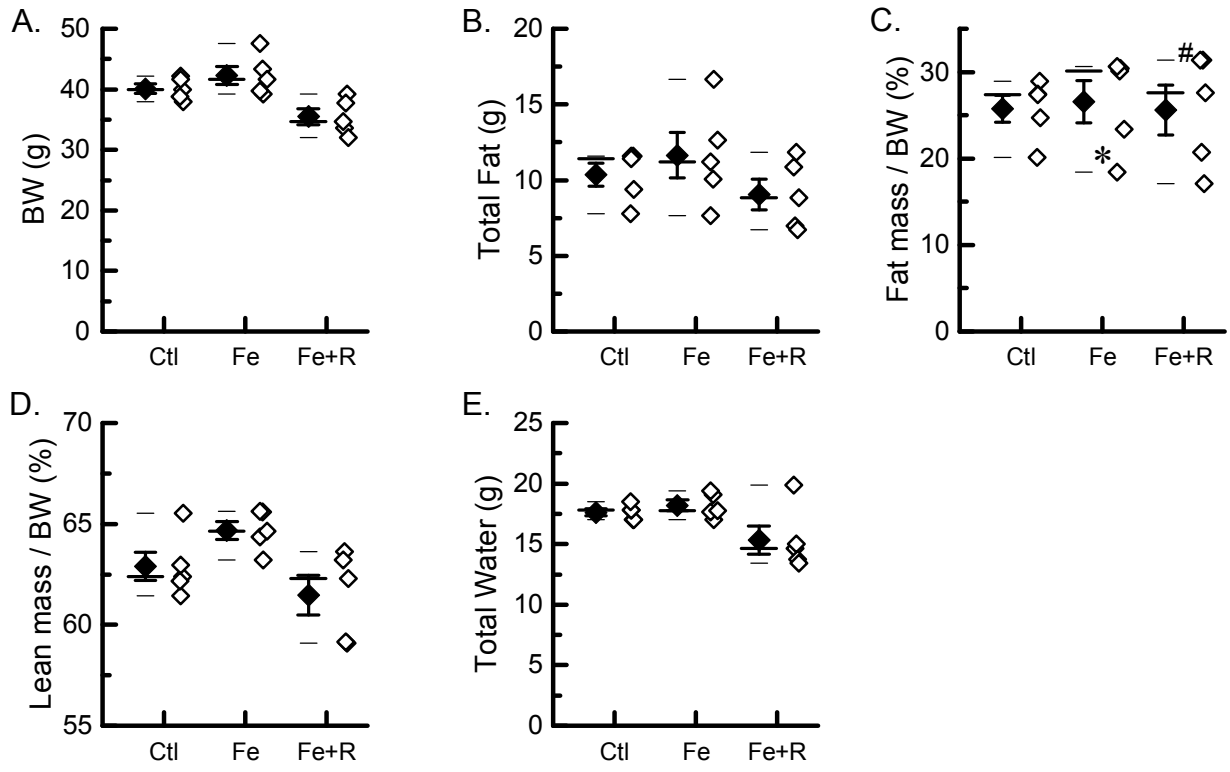

A.

Neutrophil(Ly6B.2 Alloantigen) Staining

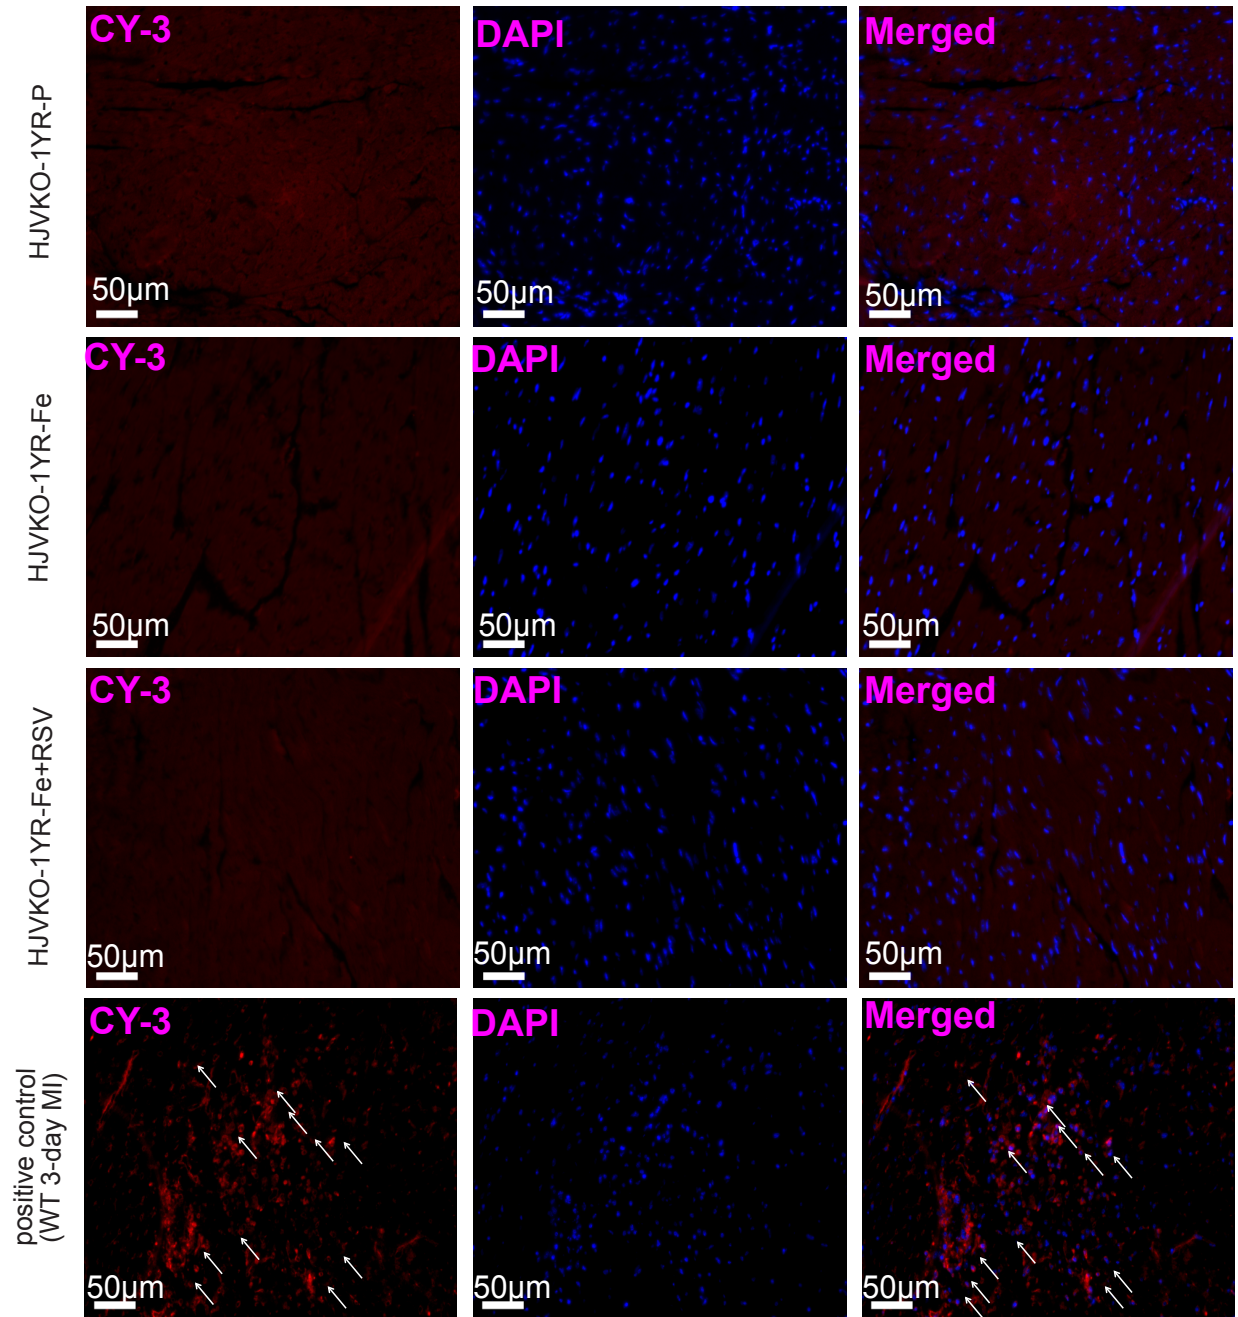

B.

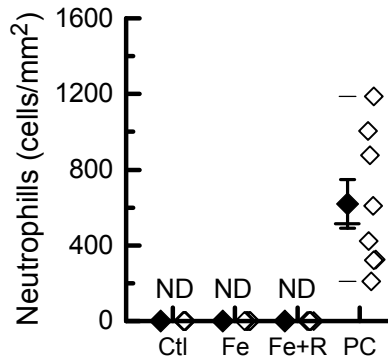

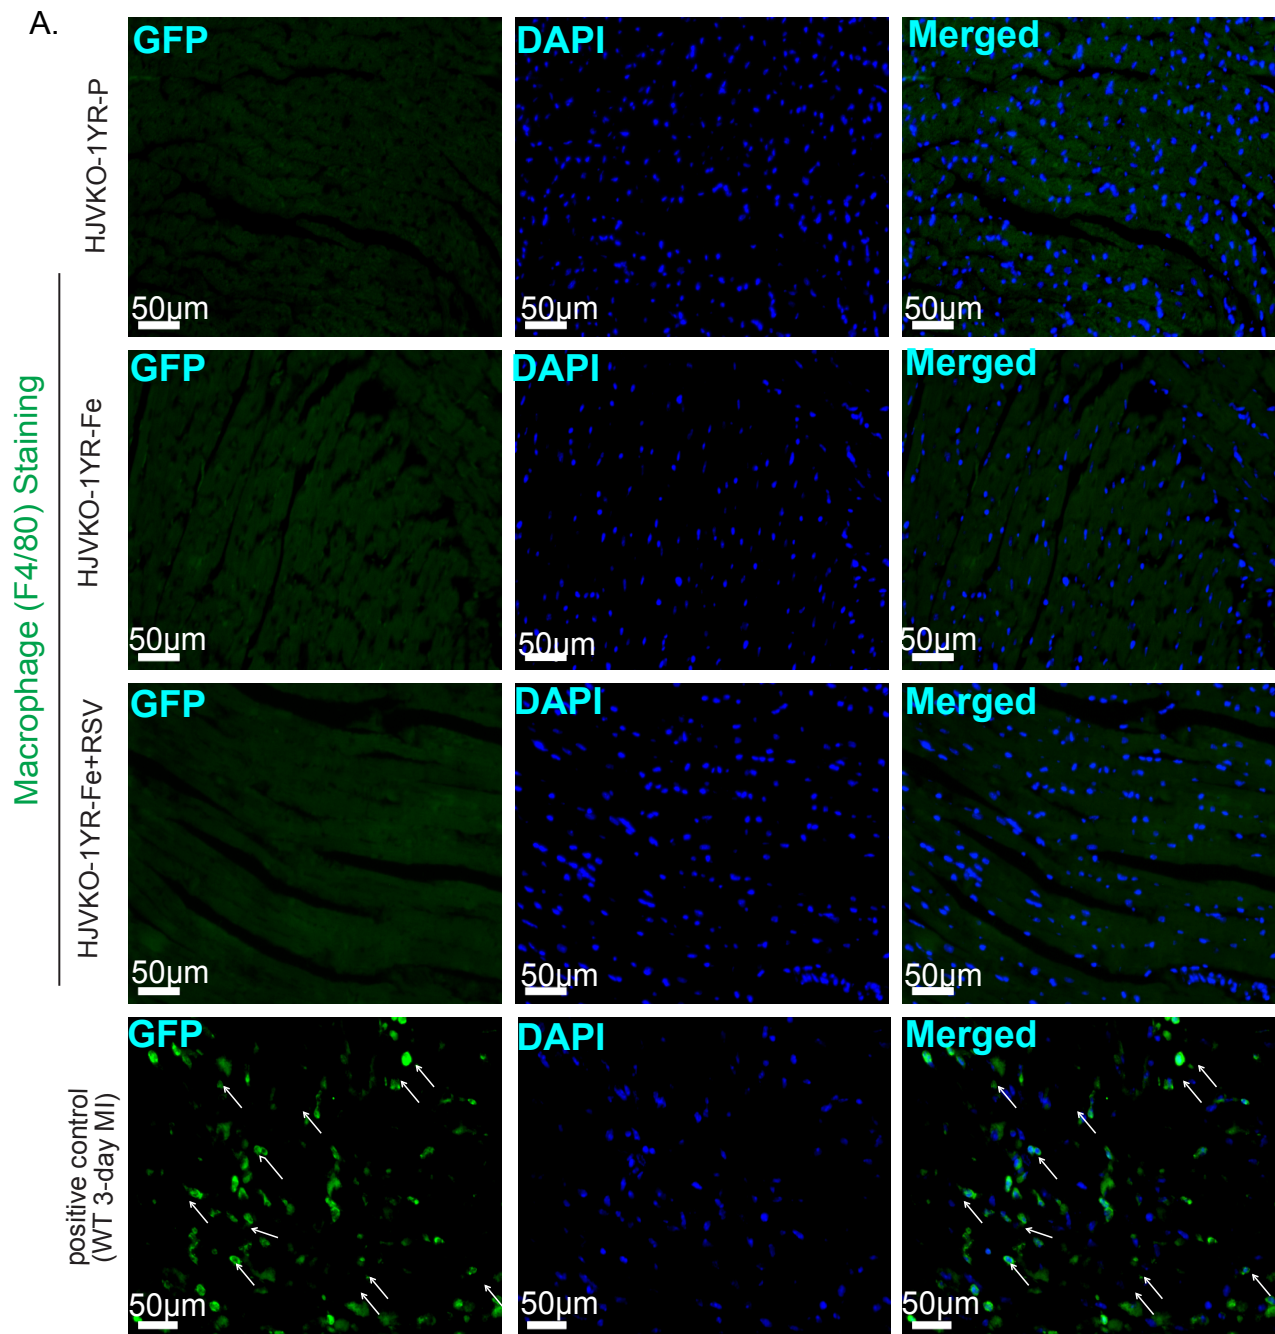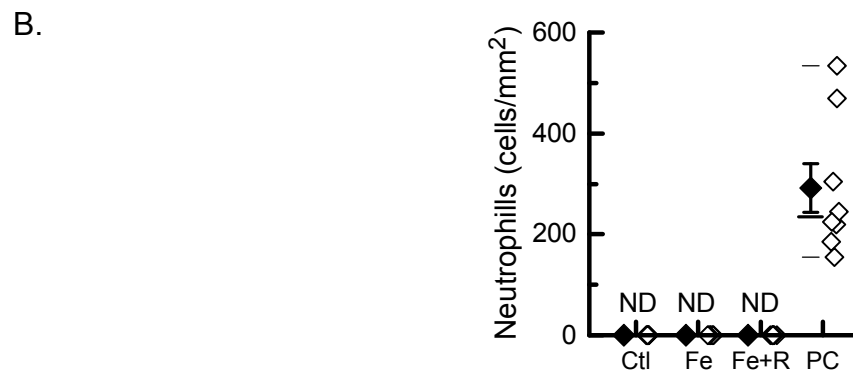

Supplement: bsr20171302_Supp1.pdf [file bsr20171302_Supp1.pdf]
